# Supplementary material
Source: PubMed Central journal article supplement (PMC6259088)
Supplement: 758975_supplementary_material_2.pdf [file 758975_supplementary_material_2.pdf]

Online Data Supplement for:

**Predicting 30-day mortality in patients with Sepsis; an exploratory analysis of process of care and patient characteristics**

Miriam Sanderson<sup>1</sup> [mzymis@exmail.nottingham.ac.uk](mailto:mzymis@exmail.nottingham.ac.uk)

Dr Marc Chikhani<sup>2,3</sup> [marc.chikhani@nottingham.ac.uk](mailto:marc.chikhani@nottingham.ac.uk)

Esme Blyth<sup>4</sup> [eblyth1@sheffield.ac.uk](mailto:eblyth1@sheffield.ac.uk)

Sally Wood<sup>2</sup> [sally.wood@nuh.nhs.uk](mailto:sally.wood@nuh.nhs.uk)

Prof Iain K Moppett<sup>2,3</sup> [iain.moppett@nottingham.ac.uk](mailto:iain.moppett@nottingham.ac.uk)

Dr Tricia McKeever<sup>5</sup> [tricia.mckeever@nottingham.ac.uk](mailto:tricia.mckeever@nottingham.ac.uk)

Dr Mark J R Simmonds<sup>2</sup> [mark.simmonds@nuh.nhs.uk](mailto:mark.simmonds@nuh.nhs.uk)

1. School of Medicine, University of Nottingham

2. Nottingham University Hospitals NHS Trust

3. Division of Clinical Neuroscience, Faculty of Medicine and Health Sciences,  
University of Nottingham

4. Sheffield Teaching Hospitals NHS Foundation Trust

5. Epidemiology and Public Health, Faculty of Medicine and Health Sciences,  
University of Nottingham

All correspondence to: [Marc.chikhani@nottingham.ac.uk](mailto:Marc.chikhani@nottingham.ac.uk)

---

**Table E1 Age and sex of patients with severe sepsis and univariate association with 30 day mortality**

| Variable                            | Dead<br>(N=119) | Alive (N=336) | OR <sup>a</sup> | 95%CI <sup>b</sup> | P-value |
|-------------------------------------|-----------------|---------------|-----------------|--------------------|---------|
|                                     | % (n)           | % (n)         |                 |                    |         |
| Age (years) mean (SD <sup>c</sup> ) | 12.1 (70.3)     | 17.4 (61.8)   |                 |                    | <0.001  |
| <b>Sex</b>                          |                 |               |                 |                    |         |
| Female N(%)                         | 25.9 (50)       | 74.1 (143)    | 1.00            |                    |         |
| Male N(%)                           | 26.3 (69)       | 73.7 (193)    | 1.02            | 0.67-1.56          | 0.92    |

<sup>a</sup> Odds Ratio

<sup>b</sup> 95% Confidence Interval

<sup>c</sup> Standard Deviation

**Table E2 Symptoms of systemic inflammatory response syndrome and univariate association with 30 day mortality**

| SIRS* Criteria                                         | Dead<br>(N=119) | Alive<br>(N=336) | OR <sup>a</sup> | 95%CI <sup>b</sup> | P-value |
|--------------------------------------------------------|-----------------|------------------|-----------------|--------------------|---------|
|                                                        | % (n)           | % (n)            |                 |                    |         |
| Fever - Core temperature >38.3°C                       | 17.8 (48)       | 82.2 (221)       | 0.35            | 0.23-0.55          | <0.001  |
| Hypothermia - Core temperature <36°C                   | 51.5 (24)       | 48.9 (23)        | 3.44            | 1.83-6.45          | <0.001  |
| Heart Rate >90/min                                     | 26.6 (102)      | 73.4 (282)       | 1.15            | 0.64-2.07          | 0.65    |
| Respiratory Rate >25/min                               | 27.1 (71)       | 72.8 (190))      | 1.14            | 0.74-1.74          | 0.56    |
| Altered mental status                                  | 36.8 (32)       | 63.2 (55)        | 1.88            | 1.14-3.10          | 0.01    |
| Oedema                                                 | 30.8 (4)        | 69.2 (9)         | 1.26            | 0.38-4.19          | 0.75    |
| Blood Glucose >6.6mmol/L                               | 31 (22)         | 69 (49)          | 1.33            | 0.76-2.31          | 0.31    |
| Leukocytosis - White blood cells>12x10 <sup>9</sup> /L | 26.2 (66)       | 173.8 (86)       | 1.00            | 0.66-1.53          | 0.98    |
| Leukopenia - White blood cells<4x10 <sup>9</sup> /L    | 29.5 (18)       | 70.5 (43)        | 1.21            | 0.67-2.20          | 0.52    |
| C-Reactive Protein >30mg/L                             | 26.5 (81)       | 73.5 (225)       | 1.05            | 0.67-1.65          | 0.83    |

\*Systemic inflammatory response syndrome

<sup>a</sup> Odds Ratio

<sup>b</sup> 95% Confidence Interval

**Table E3 Symptoms of organ dysfunction or tissue hypoperfusion and univariate association with 30 day mortality**

| <b>Criteria for organ dysfunction or tissue hypoperfusion</b>                        | <b>Dead<br/>(N=119)<br/>% (n)</b> | <b>Alive<br/>(N=336)<br/>% (n)</b> | <b>OR<sup>a</sup></b> | <b>95%CI<sup>b</sup></b> | <b>p-value</b> |
|--------------------------------------------------------------------------------------|-----------------------------------|------------------------------------|-----------------------|--------------------------|----------------|
| Saturations (<92% room air) or (PaO <sub>2</sub> /FiO <sub>2</sub> <sup>c</sup> <40) | 27.1 (62)                         | 72.9 (167)                         | 1.10                  | 0.72-1.67                | 0.65           |
| Urine Output <30ml per hour for 2 hours                                              | 26.7 (23)                         | 73.3 (63)                          | 1.04                  | 0.61-1.77                | 0.89           |
| Creatinine >175µmol/L or increased >45µmol/L                                         | 29.4 (50)                         | 70.6 (120)                         | 1.30                  | 0.85-2.00                | 0.22           |
| Coagulation Abnormalities <sup>d</sup>                                               | 50 (7)                            | 50 (7)                             | 2.94                  | 1.00-8.61                | 0.04           |
| Thrombocytopenia (<100x10 <sup>9</sup> /L)                                           | 48.3 (14)                         | 52.7 (15)                          | 2.85                  | 1.32-6.15                | 0.01           |
| Hyperbilirubinaemia (>35mmol/L)                                                      | 35.0 (14)                         | 65.0 (26)                          | 1.59                  | 0.80-3.16                | 0.18           |
| Ileus                                                                                | 25.0 (1)                          | 75.0 (3)                           | 0.94                  | 0.10-9.13                | 1.00           |
| Hyperlactaemia (>2mmol/L)                                                            | 29.0 (83)                         | 71.0 (203)                         | 1.51                  | 0.96-2.37                | 0.07           |
| Capillary refill >5 seconds                                                          | 37.5 (6)                          | 62.5 (10)                          | 1.73                  | 0.61-4.88                | 0.29           |
| Mottling                                                                             | 60.0 (9)                          | 40.0 (6)                           | 4.50                  | 1.55-13.08               | <0.001         |
| Arterial Hypotension <sup>e</sup>                                                    | 25.5 (76)                         | 74.5 (222)                         | 0.91                  | 0.59-1.41                | 0.66           |

<sup>a</sup> Odds Ratio

<sup>b</sup> 95% Confidence Interval

<sup>c</sup> Partial Pressure of Oxygen in arterial blood/Fraction of inspired oxygen

<sup>d</sup> International Normalised Ratio>1.5 or Activated Pro-Thrombin Time >60seconds

<sup>e</sup> Systolic blood pressure <90mmHg, mean arterial pressure <70mmHg or Systolic blood pressure decrease >40mmHg

**Table E4 Locations of Early Care and univariate association with 30 day mortality**

| <b>Admissions and Early Treatment locations</b> | <b>Dead<br/>(N=119)<br/>%(n)</b> | <b>Alive<br/>(N=336)<br/>%(n)</b> | <b>OR<sup>a</sup></b> | <b>95%CI<sup>b</sup></b> | <b>P-value</b> |
|-------------------------------------------------|----------------------------------|-----------------------------------|-----------------------|--------------------------|----------------|
| <b>Admission Source</b>                         |                                  |                                   |                       |                          |                |
| Emergency Department                            | 24.6 (71)                        | 75.4 (218)                        | 1.00                  |                          |                |
| Elective                                        | 25 (5)                           | 75 (15)                           | 1.02                  | 0.36-2.92                |                |
| General Practitioner                            | 29.5 (43)                        | 70.6 (103)                        | 1.28                  | 0.82-2.00                | 0.28           |
| <b>GP referral?</b>                             |                                  |                                   |                       |                          |                |
| Yes                                             | 29.5 (43)                        | 70.6 (103)                        | 1.27                  | 0.82-1.99                | 0.27           |

|                                    |            |            |      |           |       |
|------------------------------------|------------|------------|------|-----------|-------|
| No                                 | 24.6 (76)  | 75.4 (233) | 1.00 |           |       |
| <b>Speciality at Time Zero</b>     |            |            |      |           |       |
| Medical                            | 28.0 (106) | 72.0 (273) | 1.00 |           |       |
| Surgical                           | 18.2 (12)  | 81.8 (54)  | 0.57 | 0.29-1.11 | 0.124 |
| Other                              | 10.0 (1)   | 90.0 (9)   | 0.29 | 0.04-2.29 |       |
| <b>Surgical ward at Time Zero?</b> |            |            |      |           |       |
| Yes                                | 18.2 (12)  | 81.8 (54)  | 0.59 | 0.30-1.14 | 0.111 |
| No                                 | 27.5 (107) | 72.5 (282) | 1.00 |           |       |

<sup>a</sup> Odds Ratio

<sup>b</sup> 95% Confidence Interval

**Table E5 Sepsis source and control and univariate association with 30 day mortality**

|                                                         | <b>Dead<br/>(N=119)<br/>%(n)</b> | <b>Alive<br/>(N=336)<br/>%(n)</b> |                       |                          | <b>P-<br/>value</b> |
|---------------------------------------------------------|----------------------------------|-----------------------------------|-----------------------|--------------------------|---------------------|
|                                                         |                                  |                                   | <b>OR<sup>a</sup></b> | <b>95%CI<sup>b</sup></b> |                     |
| <b>Provisional Sepsis Source at 6Hrs<sup>c</sup></b>    |                                  |                                   |                       |                          |                     |
| Identified N(%)                                         | 25.4 (107)                       | 74.6 (315)                        | 0.59                  | 0.28-1.25                | 0.17                |
| Not identified N(%)                                     | 36.4 (12)                        | 63.7 (21)                         | 1.00                  |                          |                     |
| <b>Location</b>                                         |                                  |                                   |                       |                          |                     |
| Lungs N(%)                                              | 28.8 (66)                        | 71.2 (163)                        | 1.32                  | 0.87-2.01                | 0.19                |
| Liver N(%)                                              | 30.2 (13)                        | 69.8 (30)                         | 1.25                  | 0.63-2.49                | 0.52                |
| Unperforated bowel N(%)                                 | 0 (0)                            | 100 (4)                           |                       |                          | 0.58                |
| Peritoneum N(%)                                         | 28.6 (4)                         | 71.4 (10)                         | 1.13                  | 0.35-3.69                | 0.77                |
| Urinary tract N(%)                                      | 20.0 (14)                        | 80.0 (56)                         | 0.67                  | 0.36-1.25                | 0.20                |
| Intracranial N(%)                                       | 33.3 (1)                         | 66.8 (2)                          | 1.42                  | 0.13-15.8                | 1.00                |
| Heart N(%)                                              | 33.3 (1)                         | 66.7 (2)                          | 1.42                  | 0.13-15.8                | 1.00                |
| Skin N(%)                                               | 11.4 (4)                         | 88.6 (31)                         | 0.34                  | 0.12-0.99                | 0.04                |
| Bone N(%)                                               | 22.2 (2)                         | 78.8 (7)                          | 0.80                  | 0.16-3.92                | 1.00                |
| Ear nose throat N(%)                                    | 0 (0)                            | 100 (2)                           |                       |                          | 1.00                |
| Gynaecological N(%)                                     | 16.7 (1)                         | 83.3 (5)                          | 0.56                  | 0.06-4.85                | 1.00                |
| Line N(%)                                               | 0 (0)                            | 100 (3)                           |                       |                          | 0.57                |
| <b>Imaging</b>                                          |                                  |                                   |                       |                          |                     |
| Appropriate Imaging N(%)                                | 25.5 (109)                       | 74.5 (319)                        | 0.58                  | 0.26-1.31                | 0.19                |
| No appropriate Imaging N(%)                             | 37.0 (10)                        | 63.0 (17)                         | 1.00                  |                          |                     |
| <b>Time to imaging - median (IQR*)<sup>d</sup></b>      | 0.92(0.07-2.78)                  | 0.60 (0.00-2.50)                  |                       |                          | 0.59                |
| <b>Source Control</b>                                   |                                  |                                   |                       |                          |                     |
| <b>Source control appropriate immediately?</b>          |                                  |                                   |                       |                          |                     |
| Yes N(%)                                                | 18.9 (10)                        | 81.1 (43)                         | 0.63                  | 0.30-1.29                | 0.20                |
| No N(%)                                                 | 72.9 (293)                       | 27.1 (109)                        | 1.00                  |                          |                     |
| <b>When appropriate, source control within 6 Hours?</b> |                                  |                                   |                       |                          |                     |
| Yes N(%)                                                | 22.2 (6)                         | 77.8 (21)                         | 1.57                  | 0.39-6.37                | 0.44                |
| No N(%)                                                 | 15.4 (4)                         | 84.6 (22)                         | 0.62                  | 0.23-1.69                |                     |

\*Interquartile Range

<sup>a</sup> Odds Ratio

<sup>b</sup> 95% Confidence Interval

<sup>c</sup> 3 patients with missing data

<sup>d</sup> 4 patients with missing data

**Table E6 Patient escalation and univariate association with 30 day mortality**

| <b>Patient Escalation</b>                                                | <b>Dead<br/>(N=119)<br/>%(n)</b> | <b>Alive<br/>(N=336)<br/>%(n)</b> | <b>OR<sup>a</sup></b> | <b>95%CI<sup>b</sup></b> | <b>P-<br/>value</b> |
|--------------------------------------------------------------------------|----------------------------------|-----------------------------------|-----------------------|--------------------------|---------------------|
| <b>Early Warning Score<sup>c</sup></b>                                   |                                  |                                   |                       |                          |                     |
| 0-2 "stable" and 3 "At risk" N(%)                                        | 29.6 (8)                         | 70.4 (19)                         | 1.00                  |                          |                     |
| 4-5 "Doctor Review" N(%)                                                 | 28.7 (27)                        | 71.3 (67)                         | 0.96                  | 0.37-2.46                |                     |
| 6+ "Critical Care Outreach Team aware"<br>N(%)                           | 25.4 (84)                        | 74.6 (247)                        | 0.81                  | 0.34-1.92                | 0.46                |
| <b>Appropriate escalation?</b>                                           |                                  |                                   |                       |                          |                     |
| Yes N(%)                                                                 | 74.4 (325)                       | 25.6 (112)                        | 0.40                  | 0.13-1.23                | 0.12                |
| No N(%)                                                                  | 46.2 (6)                         | 53.9 (7)                          | 1.00                  |                          |                     |
| N/A N(%)                                                                 | 20.0 (1)                         | 80.0 (4)                          | 0.29                  | 0.02-3.91                |                     |
| <b>Time to escalation - median (IQR*)</b>                                | 0.0(-0.12-<br>0.0)               | 0.0<br>(-0.02-0.0)                |                       |                          | 0.96                |
| <b>Critical Care Outreach Team called<br/>within 1 Hour?<sup>d</sup></b> |                                  |                                   |                       |                          |                     |
| Yes N(%)                                                                 | 30.4 (21)                        | 69.6 (48)                         | 1.23                  | 0.69-2.19                | 0.62                |
| No N(%)                                                                  | 26.2 (76)                        | 73.8 (214)                        | 1.00                  |                          |                     |
| Out of Hours                                                             | 23.7 (22)                        | 76.3 (71)                         | 0.87                  | 0.51-1.51                |                     |
| <b>Time to Doctor - median (IQR*)</b>                                    | 0.17(0.00-<br>0.55)              | 0.17 (0.00-<br>0.50)              |                       |                          | 0.99                |
| <b>Grade of doctor</b>                                                   |                                  |                                   |                       |                          |                     |
| F1 N(%)                                                                  | 12.2 (5)                         | 87.8 (36)                         | 0.49                  | 0.15-1.58                | 0.15                |
| F2/ST1/ST2 N(%)                                                          | 28.7 (55)                        | 71.4 (137)                        | 1.42                  | 0.68-2.99                |                     |
| ST3+/SPR N(%)                                                            | 27.9 (48)                        | 72.1 (124)                        | 1.37                  | 0.65-2.91                |                     |
| Consultant N(%)                                                          | 22.0 (11)                        | 78.0 (39)                         | 1.00                  |                          |                     |
| <b>Critical Care Outreach Team review<br/>after Initial diagnosis?</b>   |                                  |                                   |                       |                          |                     |
| Yes N(%)                                                                 | 25.6 (33)                        | 74.4 (96)                         | 0.96                  | 0.60-1.53                | 0.86                |
| No N(%)                                                                  | 26.4 (86)                        | 73.6 (240)                        | 1.00                  |                          |                     |
| <b>Time to Critical Care Outreach Team -<br/>median (IQR)</b>            | 4.08(1.20-<br>11.00)             | 5.08(1.76-<br>0.17)               |                       |                          | 0.53                |
| <b>Time to Senior Doctor - median<br/>(IQR*)<sup>e</sup></b>             | 0.75(1.30-<br>2.15)              | 0.75 (0.13-<br>2.07)              |                       |                          | 0.84                |
| <b>No senior doctor seen N(%)</b>                                        | 0 (0)                            | 100(1)                            |                       |                          |                     |

|                                                                                      |                   |                    |  |  |      |
|--------------------------------------------------------------------------------------|-------------------|--------------------|--|--|------|
| <b>Considered for Intensive Therapy Unit (ITU)?</b>                                  |                   |                    |  |  |      |
| Yes N(%)                                                                             | 26.2 (119)        | 73.8 (335)         |  |  |      |
| No N(%)                                                                              | 100 (1)           | 0 (0)              |  |  | 1.00 |
| <b>Time to Intensive Therapy Unit assessment - median (IQR*)<sup>f</sup></b>         | 3.67(2.00-8.00)   | 3.56 (2.13-7.39)   |  |  | 0.98 |
| <b>Time to Intensive Therapy Unit Admission - median (IQR*)</b>                      | 7.00(4.05-13.25)  | 6.80 (4.00-11.13)  |  |  | 0.65 |
| <b>Time to Intensive Therapy Unit Assessment Level 3 - median (IQR*)<sup>g</sup></b> | 17.93(6.00-20.91) | 15.88(12.40-31.05) |  |  | 0.57 |
| <b>Time to Intensive Therapy Unit Level 3 - median (IQR*)</b>                        | 21.33(6.00-29.33) | 17.83(12.75-31.48) |  |  | 0.83 |

\*Interquartile Range

<sup>a</sup> Odds Ratio

<sup>b</sup> 95% Confidence Interval

<sup>c</sup> 3 patients with missing data

<sup>d</sup> 3 patients with missing data

<sup>e</sup> 1 patient with missing data

<sup>f</sup> 5 patients with missing data

<sup>g</sup> 5 patients with missing data

**Table E7 Blood cultures and antibiotics and univariate association with 30 day mortality**

| <b>Variable</b>                                           | <b>Dead<br/>(N=119)<br/>%(n)</b> | <b>Alive<br/>(N=336)<br/>%(n)</b> | <b>OR<sup>a</sup></b> | <b>95%CI<sup>b</sup></b> | <b>P-<br/>value</b> |
|-----------------------------------------------------------|----------------------------------|-----------------------------------|-----------------------|--------------------------|---------------------|
| <b>Blood cultures within 6 Hours of time zero?</b>        |                                  |                                   |                       |                          |                     |
| 1 set N(%)                                                | 25.7 (70)                        | 74.3 (202)                        | 0.81                  | 0.50-1.31                | 0.19                |
| 2+ set N(%)                                               | 21.2 (14)                        | 78.8 (52)                         | 0.63                  | 0.31-1.29                |                     |
| No N(%)                                                   | 29.9 (35)                        | 70.1 (82)                         | 1.00                  |                          |                     |
| <b>Blood culture before Time Zero (if no to previous)</b> |                                  |                                   |                       |                          |                     |
| Yes N(%)                                                  | 30.1 (22)                        | 69.9 (51)                         | 1.03                  | 0.45-2.34                | 0.33                |
| No N(%)                                                   | 29.6 (13)                        | 70.5 (31)                         | 1.00                  |                          |                     |
| <b>Time to Blood Culture - median</b>                     |                                  |                                   |                       |                          |                     |



|                                           |              |                |      |           |      |
|-------------------------------------------|--------------|----------------|------|-----------|------|
| <b>(IQR*)</b>                             |              |                |      |           |      |
| Before Time Zero                          | 26.5 (36)    | 73.5 (100)     | 1.00 |           | 0.73 |
| 0-4 Hours                                 | 24.6 (58)    | 75.4 (178)     | 0.91 | 0.56-1.47 |      |
| 4+ Hours                                  | 31.8 (14)    | 68.2 (30)      | 1.30 | 0.62-2.73 |      |
| <b>Blood culture before antibiotics?</b>  |              |                |      |           |      |
| Yes N(%)                                  | 25.0 (61)    | 75.0 (183)     | 0.88 | 1.58-1.34 | 0.55 |
| No N(%)                                   | 27.5 (58)    | 72.5 (153)     | 1.00 |           |      |
| <b>Antibiotic after Time Zero</b>         |              |                |      |           |      |
| Yes N(%)                                  | 26.2 (119)   | 73.9 (336)     |      |           |      |
| <b>Antibiotic adhere local guidelines</b> |              |                |      |           |      |
| Yes N(%)                                  | 26.3 (119)   | 73.7 (336)     |      |           | 1.00 |
| No N(%)                                   | 0 (0)        | 100 (2)        |      |           |      |
| <b>Antibiotics before Time Zero</b>       |              |                |      |           |      |
| Yes N(%)                                  | 31.0 (27)    | 69.0 (60)      | 1.35 | 0.81-2.26 | 0.25 |
| No N(%)                                   | 25.0 (92)    | 75.0 (276)     | 1.00 |           |      |
| <b>Time to antibiotic - median (IQR*)</b> | 0.56 (0-1.4) | 0.5 (0.07-1.0) |      |           | 0.69 |

\*Interquartile Range

<sup>a</sup>Odds Ratio

<sup>b</sup> 95% Confidence Interval

**Table E8 Lactate, the hypotensive patient, and univariate association with 30 day mortality**

| <b>Variable</b>                                                                  | <b>Dead<br/>(N=119)<br/>%(n)</b> | <b>Alive<br/>(N=336)<br/>%(n)</b> | <b>OR<sup>1</sup></b> | <b>95%CI<sup>2</sup></b> | <b>P-<br/>value</b> |
|----------------------------------------------------------------------------------|----------------------------------|-----------------------------------|-----------------------|--------------------------|---------------------|
| <b>Lactate Measured?</b>                                                         |                                  |                                   |                       |                          |                     |
| Yes N(%)                                                                         | 25.7 (114)                       | 74.3 (330)                        | 0.41                  | 0.12-1.39                | 0.14                |
| No N(%)                                                                          | 45.5 (5)                         | 54.6 (6)                          | 1.00                  |                          |                     |
| <b>Lactate Value - median (IQR*)</b>                                             | 3.30(2.20-<br>5.40)              | 2.55 (1.50-<br>4.10)              |                       |                          | <0.001              |
| <b>Time to lactate - median (IQR*)<sup>3</sup></b>                               | 0.25 (0-<br>0.93)                | 0.38 (0.0-<br>1.28)               |                       |                          | 0.16                |
| <b>Hypotension or hyperlactate?</b>                                              |                                  |                                   |                       |                          |                     |
| Yes N(%)                                                                         | 27.2 (98)                        | 72.9 (263)                        | 1.30                  | 0.76-2.22                | 0.35                |
| No N(%)                                                                          | 22.3 (21)                        | 77.7 (73)                         | 1.00                  |                          |                     |
| <b>Crystalloid or colloid?</b>                                                   |                                  |                                   |                       |                          |                     |
| Yes N(%)                                                                         | 27.1 (95)                        | 72.9 (255)                        | 0.99                  | 0.26-3.83                | 0.65                |
| No N(%)                                                                          | 27.3 (3)                         | 72.7 (8)                          | 1.00                  |                          |                     |
| N/A N(%)                                                                         | 22.3 (21)                        | 77.7 (73)                         | 0.77                  | 0.19-3.15                |                     |
| <b>Time to fluid - median (IQR*)</b>                                             | 0.50(0.17-<br>1.17)              | 0.50(0.22-<br>1.03)               |                       |                          | 0.60                |
| <b>Fail fluid challenge<sup>a</sup> or new renal<br/>impairment?<sup>a</sup></b> |                                  |                                   |                       |                          |                     |
| Yes N(%)                                                                         | 26.9 (93)                        | 73.1 (253)                        | 1.17                  | 0.71-1.94                | 0.53                |
| No N(%)                                                                          | 23.9 (26)                        | 76.2 (83)                         | 1.00                  |                          |                     |
| <b>Urine Catheter?</b>                                                           |                                  |                                   |                       |                          |                     |
| Yes N(%)                                                                         | 27.0 (90)                        | 73.0 (243)                        | 1.23                  | 0.33-4.59                | 0.82                |
| No N(%)                                                                          | 23.1 (3)                         | 76.9 (10)                         | 1.00                  |                          |                     |
| N/A N(%)                                                                         | 23.9 (26)                        | 76.2 (83)                         | 1.04                  | 0.27-4.08                |                     |
| <b>Fluid balance chart completed?</b>                                            |                                  |                                   |                       |                          |                     |
| Yes N(%)                                                                         | 27.1 (88)                        | 72.9 (237)                        | 1.19                  | 0.42-3.35                | 0.67                |
| No N(%)                                                                          | 23.8 (5)                         | 76.2 (16)                         | 1.00                  |                          |                     |
| N/A N(%)                                                                         | 23.9 (26)                        | 76.2 (83)                         | 1.00                  | 0.33-3.01                |                     |

<sup>a</sup> Persistent systolic blood pressure <90mmHg or mean arterial pressure <70mmHg despite fluid resuscitation

\*Interquartile Range

<sup>1</sup> Odds Ratio

<sup>2</sup> 95% Confidence Interval

<sup>3</sup>2 patients with missing data

**Table E9 Interventions for a patient with septic shock, and univariate association with 30 day mortality**

| <b>Variable</b>                                            | <b>Dead<br/>(N=119)<br/>%(n)</b> | <b>Alive<br/>(N=336)<br/>%(n)</b> | <b>OR<sup>1</sup></b> | <b>95%CI<sup>2</sup></b> | <b>P-value</b> |
|------------------------------------------------------------|----------------------------------|-----------------------------------|-----------------------|--------------------------|----------------|
| <b>Fluid refractory<sup>a</sup> sepsis?</b>                |                                  |                                   |                       |                          |                |
| Yes N(%)                                                   | 23.9 (59)                        | 76.1 (188)                        | 0.60                  | 0.36-1.00                | 0.09           |
| No N(%)                                                    | 34.3 (34)                        | 65.7 (65)                         | 1.00                  |                          |                |
| N/A N(%)                                                   | 23.9 (26)                        | 76.1 (83)                         | 0.60                  | 0.33-1.1                 |                |
| <b>Central Venous Catheter placed?</b>                     |                                  |                                   |                       |                          |                |
| Yes N(%)                                                   | 27.0 (90)                        | 73.0 (243)                        | 1.05                  | 0.28-3.94                | 0.63           |
| No N(%)                                                    | 23.1 (3)                         | 76.9 (10)                         | 1.00                  |                          |                |
| N/A N(%)                                                   | 23.9 (26)                        | 76.2 (83)                         | 1.35                  | 0.36-5.08                |                |
| <b>Time to Central Venous Catheter - median (IQR*)</b>     | 6.91(3.58-12.4)                  | 5.95 (3.32-12.5)                  |                       |                          | 0.64           |
| <b>Vasopressors<sup>3</sup></b>                            |                                  |                                   |                       |                          |                |
| Yes N(%)                                                   | 21.1 (54)                        | 72.9 (145)                        | 2.89                  | 0.97-8.56                | 0.19           |
| No N(%)                                                    | 11.4 (4)                         | 88.6 (31)                         | 1.00                  |                          |                |
| N/A N(%)                                                   | 28.2 (58)                        | 71.8 (148)                        | 3.04                  | 1.03-8.99                |                |
| <b>Time to Vasopressors - median (IQR*)</b>                | 7.75(4.65-15.55)                 | 7.33(4.25-13.75)                  |                       |                          | 0.75           |
| <b>Remain hypotensive<sup>a?4</sup></b>                    |                                  |                                   |                       |                          |                |
| Yes N(%)                                                   | 54.6 (12)                        | 45.5 (10)                         | 3.80                  | 1.53-9.40                | 0.01           |
| No N(%)                                                    | 24.0 (43)                        | 76.0 (136)                        | 1.00                  |                          |                |
| N/A N(%)                                                   | 26.4 (63)                        | 73.6 (176)                        | 1.13                  | 0.72-1.77                |                |
| <b>Time to inotropes - median (IQR*)</b>                   | 9.25(4.00-19.35)                 | 7.75 (5.67-14.55)                 |                       |                          | 0.62           |
| <b>If low Haemoglobin (&lt;7.0g/dl), blood transfused?</b> |                                  |                                   |                       |                          |                |
| Yes N(%)                                                   | 44.4 (4)                         | 55.6 (5)                          | 2.30                  | 0.61-8.76                | 0.25           |
| N/A N(%)                                                   | 25.8 (115)                       | 74.2 (331)                        | 1.00                  |                          |                |

<sup>a</sup> Persistent systolic blood pressure <90mmHg or mean arterial pressure <70mmHg despite fluid resuscitation

\*Interquartile Range

<sup>1</sup> Odds Ratio

<sup>2</sup> 95% Confidence Interval

<sup>3</sup> 15 patients with missing data

<sup>4</sup> 15 patients with missing data

**Table E10 Interventions within allotted time-frame and univariate association with 30 day mortality**

| <b>Variable</b>                                                  | <b>Dead<br/>(N=119)<br/>%(n)</b> | <b>Alive<br/>(N=336)<br/>%(n)</b> | <b>OR<sup>a</sup></b> | <b>95%CI<sup>b</sup></b> | <b>P-<br/>value</b> |
|------------------------------------------------------------------|----------------------------------|-----------------------------------|-----------------------|--------------------------|---------------------|
| <b>Lactate measured within 6 Hours?</b>                          |                                  |                                   |                       |                          |                     |
| Yes N(%)                                                         | 25.7 (110)                       | 74.3 (318)                        | 0.69                  | 0.30-1.59                | 0.38                |
| No N(%)                                                          | 33.3 (9)                         | 66.7 (18)                         | 1.00                  |                          |                     |
| <b>Blood Culture within 6 Hours?</b>                             |                                  |                                   |                       |                          |                     |
| Yes N(%)                                                         | 25.6 (105)                       | 74.5 (306)                        | 0.74                  | 0.38-1.44                | 0.37                |
| No N(%)                                                          | 31.8 (14)                        | 68.2 (30)                         | 1.00                  |                          |                     |
| <b>Antibiotics within 1 Hour?</b>                                |                                  |                                   |                       |                          |                     |
| Yes N(%)                                                         | 24.5 (84)                        | 75.5 (259)                        | 0.71                  | 0.45-1.14                | 0.16                |
| No N(%)                                                          | 31.3 (35)                        | 68.8 (77)                         | 1.00                  |                          |                     |
| <b>Fluid resuscitation within 6 Hours?</b>                       |                                  |                                   |                       |                          |                     |
| Yes N(%)                                                         | 26.6 (93)                        | 73.4 (257)                        | 0.63                  | 0.18-2.22                | 0.58                |
| No N(%)                                                          | 36.4 (4)                         | 26.6 (7)                          | 1.00                  |                          |                     |
| N/A N(%)                                                         | 23.4 (22)                        | 76.6 (72)                         | 0.53                  | 0.14-2.00                |                     |
| <b>Urine Catheter within 6 Hours?<sup>c</sup></b>                |                                  |                                   |                       |                          |                     |
| Yes N(%)                                                         | 27.2 (89)                        | 72.8 (238)                        | 1.50                  | 0.41-5.43                | 0.88                |
| No N(%)                                                          | 20.0 (3)                         | 80.0 (12)                         | 1.00                  |                          |                     |
| N/A N(%)                                                         | 23.9 (26)                        | 76.2 (86)                         | 1.25                  | 0.33-4.78                |                     |
| Missing N(%)                                                     | 25.0 (1)                         | 75.0 (3)                          | 1.33                  | 0.10-19.20               |                     |
| <b>Fluid Balance chart completed within 6 Hours?<sup>d</sup></b> |                                  |                                   |                       |                          |                     |
| Yes N(%)                                                         | 26.6 (87)                        | 73.4 (240)                        | 1.27                  | 0.41-3.96                | 0.91                |
| No N(%)                                                          | 22.2 (4)                         | 77.8 (14)                         | 1.00                  |                          |                     |
| N/A N(%)                                                         | 25.0 (26)                        | 75.0 (78)                         | 1.17                  | 0.35-3.86                |                     |
| <b>Central Venous Catheter within 6 Hours?</b>                   |                                  |                                   |                       |                          |                     |
| Yes N(%)                                                         | 22.7 (29)                        | 77.3 (99)                         | 0.77                  | 0.43-1.39                | 0.88                |
| No N(%)                                                          | 27.0 (30)                        | 73.0 (81)                         |                       |                          |                     |
| N/A N(%)                                                         | 27.8 (60)                        | 72.2 (156)                        | 1.01                  |                          |                     |
| <b>Vasopressors within 6 Hours?</b>                              |                                  |                                   |                       |                          |                     |
| Yes N(%)                                                         | 23.4 (22)                        | 76.6 (72)                         | 0.83                  | 0.44-1.54                | 0.95                |
| No N(%)                                                          | 27.0 (34)                        | 73.0 (92)                         |                       |                          |                     |
| N/A N(%)                                                         | 26.8 (63)                        | 73.2 (172)                        | 0.99                  | 0.61-1.62                |                     |

| <b>Inotropes within 6 Hours?<sup>e</sup></b>         |            |            |      |            |       |
|------------------------------------------------------|------------|------------|------|------------|-------|
| Yes N(%)                                             | 41.7 (5)   | 58.3 (7)   | 0.79 | 0.18-3.37  | 0.035 |
| No N(%)                                              | 47.6 (10)  | 52.4 (11)  | 1.00 |            |       |
| N/A N(%)                                             | 24.9 (104) | 75.1 (313) | 0.36 | 0.15-0.89  |       |
| <b>Blood Transfusion within 6 Hours?<sup>f</sup></b> |            |            |      |            |       |
| Yes N(%)                                             | 33.3 (2)   | 66.7 (4)   | 1.00 | 0.09-11.02 | 0.29  |
| No N(%)                                              | 33.3 (2)   | 66.7 (4)   | 1.00 |            |       |
| N/A N(%)                                             | 26.6 (114) | 73.4 (315) | 0.72 | 0.13-4.00  |       |

\*Interquartile Range

<sup>a</sup> Odds Ratio

<sup>b</sup> 95% Confidence Interval

<sup>c</sup> 4 patients missing data

<sup>d</sup> 6 patients missing data

<sup>e</sup> 5 patients missing data

<sup>f</sup> 14 patients missing data

**Table E11 Hospital-acquired sepsis and resource issues, and univariate association with 30 day mortality**

| <b>Variable</b>                  | <b>Dead<br/>(N=119)<br/>%(n)</b> | <b>Alive<br/>(N=336)<br/>%(n)</b> | <b>OR<sup>a</sup></b> | <b>95%CI<sup>b</sup></b> | <b>P-<br/>value</b> |
|----------------------------------|----------------------------------|-----------------------------------|-----------------------|--------------------------|---------------------|
| <b>Hospital-acquired sepsis?</b> |                                  |                                   |                       |                          |                     |
| Yes N(%)                         | 35.8 (34)                        | 64.2 (61)                         | 1.80                  | 1.11-2.94                | 0.016               |
| No N(%)                          | 23.6 (85)                        | 76.4 (275)                        |                       |                          |                     |
| <b>Resource issues?</b>          |                                  |                                   |                       |                          |                     |
| Yes N(%)                         | 23.6 (17)                        | 76.4 (55)                         | 0.85                  | 0.47-1.53                | 0.59                |
| No N(%)                          | 26.6 (102)                       | 73.4 (281)                        | 1.00                  |                          |                     |

<sup>a</sup> Odds Ratio

<sup>b</sup> 95% Confidence Interval
